# Supplementary material
Source: publisher site journal article supplement (https://www.spandidos-publications.com/3498/downloadSupplementary)

Figure S1. Weight changes in BLM-induced mice compared with the Ctr group. \*\*P<0.01 and \*\*\*P<0.001. Ctr, control; BLM, bleomycin.

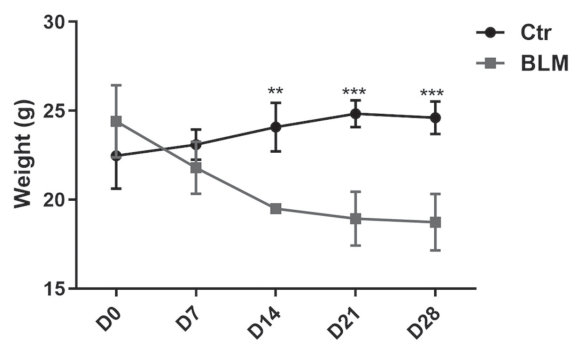

Supplement: Supplementary file 1 [file downloadSupplementary]
